# Supplementary material
Source: PubMed Central journal article supplement (PMC6867367)
Supplement: ehp-127-107004-s001.pdf [file ehp-127-107004-s001.pdf]

**Note to readers with disabilities:** *EHP* strives to ensure that all journal content is accessible to all readers. However, some figures and Supplemental Material published in *EHP* articles may not conform to [508 standards](#) due to the complexity of the information being presented. If you need assistance accessing journal content, please contact [ehp508@niehs.nih.gov](mailto:ehp508@niehs.nih.gov). Our staff will work with you to assess and meet your accessibility needs within 3 working days.

### **Supplemental Material**

#### **Transfer and Metabolism of the Xenoestrogen Zearalenone in Human Perfused Placenta**

Benedikt Warth, Karin Preindl, Pius Manser, Peter Wick, Doris Marko, and  
Tina Buerki-Thurnherr

#### **Table of Contents**

**Table S1.** Calculated recoveries  $\pm$  standard deviation [%] in the three investigated matrices obtained from spiking experiments.

**Table S2.** Impurities of added ZEN (experiment 1-3).

**Figure S1.** MRM (multiple reaction monitoring) chromatograms of reference standards spiked into blank medium and a fetal medium sample after 360 minutes; quantifier transitions in blue: zearalenone-14-sulfate (ZEN-14-Sulf)  $m/z$  397.1  $\rightarrow$  317.2;  $\alpha$ -zearalenol ( $\alpha$ -ZEL)  $m/z$  319.2  $\rightarrow$  275.2; zearalenone (ZEN)  $m/z$  317  $\rightarrow$  175; qualifier transition in green: ZEN-14-Sulf  $m/z$  397.1  $\rightarrow$  175.1;  $\alpha$ -ZEL  $m/z$  319.2  $\rightarrow$  160.1; ZEN  $m/z$  317  $\rightarrow$  131.

**Figure S2.** Perfusion profiles and fetal-maternal ratios (FM ratio) of  $\beta$ -zearalenol ( $\beta$ -ZEL) and zearalanone (ZAN).  $\beta$ -ZEL and ZAN, present as contaminants in ZEN (around 1%; 3  $\mu\text{g/L}$ ), were measured from the maternal and fetal perfusates by UPLC-MS/MS at several time points during 6 h of perfusion with 318  $\mu\text{g/L}$  ZEN. FM ratios were calculated for each time point and FM ratios of antipyrine and creatinine were added for comparison. Data represent mean  $\pm$  SD of three independent placentae perfused with medium containing ZEN.  $p < 0.05$  is considered statistically significant (\* denotes differences between maternal and fetal concentrations in  $\beta$ -ZEL or ZAN perfusions; # and \$ denote differences in the FM ratio between metabolites and antipyrine or metabolites and creatinine, respectively). Perfusion data comparing maternal and fetal concentrations were analyzed by unpaired Student's t-test.

**Excel Table S1.** Concentrations of measured analytes in perfusion medium [ $\mu\text{g/L}$ ].

Perfusions without ZEN (C1-3), perfusions with addition of ZEN (ZEN1-3).

**Additional File-** SupplementalMaterial\_Data.zip

**Table S1** calculated recoveries  $\pm$  standard deviation [%] in the three investigated matrices obtained from spiking experiments

|                       | placental tissue | fetal plasma | perfusion medium |
|-----------------------|------------------|--------------|------------------|
| $\alpha$ -ZAL         | 95 $\pm$ 8       | 98 $\pm$ 7   | 91 $\pm$ 15      |
| $\alpha$ -ZEL         | 84 $\pm$ 12      | 91 $\pm$ 3   | 94 $\pm$ 10      |
| $\alpha$ -ZEL-14-GlcA | 91 $\pm$ 5       | 96 $\pm$ 3   | 108 $\pm$ 7      |
| $\beta$ -ZAL          | 95 $\pm$ 6       | 95 $\pm$ 8   | 77 $\pm$ 26      |
| $\beta$ -ZEL          | 93 $\pm$ 11      | 99 $\pm$ 15  | 74 $\pm$ 22      |
| $\beta$ -ZEL-14-GlcA  | 97 $\pm$ 1       | 88 $\pm$ 11  | 112 $\pm$ 12     |
| ZAN                   | 84 $\pm$ 11      | 95 $\pm$ 2   | 87 $\pm$ 4       |
| ZEN                   | 88 $\pm$ 2       | 89 $\pm$ 11  | 100 $\pm$ 13     |
| ZEN-14-GlcA           | 92 $\pm$ 10      | 82 $\pm$ 4   | 96 $\pm$ 12      |
| ZEN-14-Sulf           | 89 $\pm$ 2       | 90 $\pm$ 1   | 97 $\pm$ 3       |

$\alpha$ -zearalanol ( $\alpha$ -ZAL);  $\alpha$ -zearalenol ( $\alpha$ -ZEL);  $\alpha$ -zearalenol-14-glucuronide ( $\alpha$ -ZEL-14-GlcA);  $\beta$ -zearalanol ( $\beta$ -ZAL);  $\beta$ -zearalenol ( $\beta$ -ZEL);  $\beta$ -zearalenol-14-glucuronide ( $\beta$ -ZEL-14-GlcA); zearalanone (ZAN); zearalenone (ZEN); zearalenone-14-glucuronide (ZEN-14-GlcA); zearalenone-14-sulfate (ZEN-14-Sulf)

**Table S2** Impurities of added ZEN (experiment 1-3)

|               | $\beta$ -ZEL [%] | ZAN [%]         |
|---------------|------------------|-----------------|
| ZEN1          | 1.40             | 1.05            |
| ZEN2          | 1.09             | 1.04            |
| ZEN3          | 1.48             | 0.95            |
| Mean $\pm$ SD | 1.32 $\pm$ 0.2   | 1.01 $\pm$ 0.05 |

$\beta$ -zearalenol ( $\beta$ -ZEL); zearalanone (ZAN)

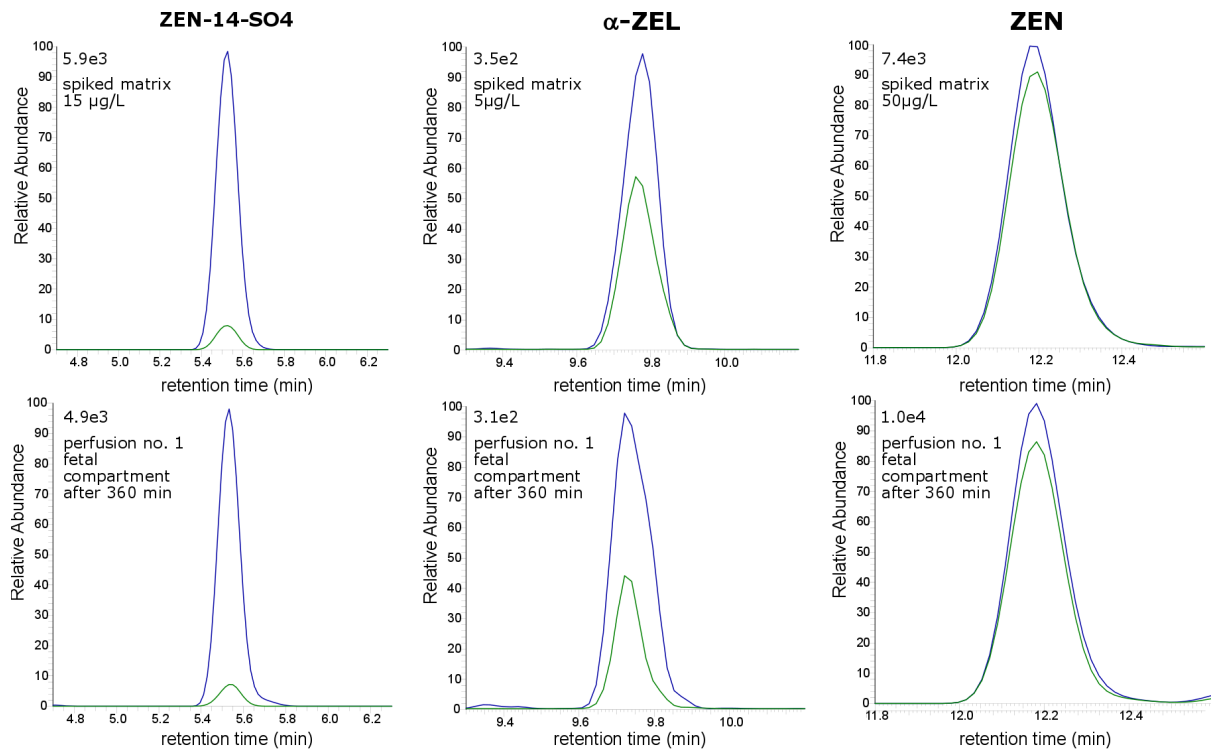

**Figure S1:** MRM (multiple reaction monitoring) chromatograms of reference standards spiked into blank medium and a fetal medium sample after 360 minutes; quantifier transitions in blue: zearalenone-14-sulfate (ZEN-14-Sulf)  $m/z$  397.1  $\rightarrow$  317.2;  $\alpha$ -zearalenol ( $\alpha$ -ZEL)  $m/z$  319.2  $\rightarrow$  275.2; zearalenone (ZEN)  $m/z$  317  $\rightarrow$  175; qualifier transition in green: ZEN-14-Sulf  $m/z$  397.1  $\rightarrow$  175.1;  $\alpha$ -ZEL  $m/z$  319.2  $\rightarrow$  160.1; ZEN  $m/z$  317  $\rightarrow$  131

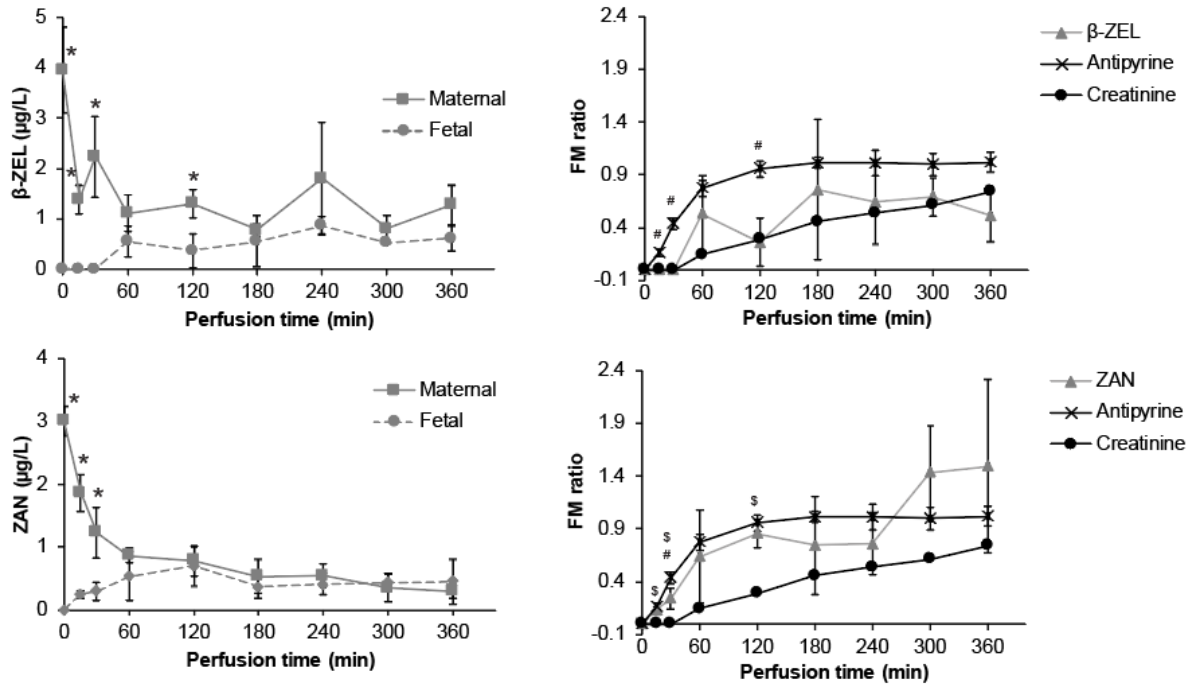

**Figure S2:** Perfusion profiles and fetal-maternal ratios (FM ratio) of  $\beta$ -zearealenol ( $\beta$ -ZEL) and zearalanone (ZAN).  $\beta$ -ZEL and ZAN, present as contaminants in ZEN (around 1%; 3  $\mu\text{g/L}$ ), were measured from the maternal and fetal perfusates by UPLC-MS/MS at several time points during 6 h of perfusion with 318  $\mu\text{g/L}$  ZEN. FM ratios were calculated for each time point and FM ratios of antipyrine and creatinine were added for comparison. Data represent mean  $\pm$  SD of three independent placentae perfused with medium containing ZEN.  $p < 0.05$  is considered statistically significant (\* denotes differences between maternal and fetal concentrations in  $\beta$ -ZEL or ZAN perfusions; # and \$ denote differences in the FM ratio between metabolites and antipyrine or metabolites and creatinine, respectively). Perfusion data comparing maternal and fetal concentrations were analyzed by unpaired Student's t-test.
